# Supplementary material for: Five-Fraction Stereotactic Radiotherapy for Brain Metastases—A Retrospective Analysis
Source: MDPI journal article supplement (doi:10.3390/curroncol30020101), 2023-01-17
Supplement: s1 [file s1]

**Suppl. Table S1:** Characteristics of patients with radiation necrosis.

| Patient ID | Histology | Age (years) | KPS | Location  | Treatment setting | Previous RT        | Number of BMs | ITX                 | ITX discontinuation | PTV (cc) | Time to RN (days) | PFS (months) | OS (months) |
|------------|-----------|-------------|-----|-----------|-------------------|--------------------|---------------|---------------------|---------------------|----------|-------------------|--------------|-------------|
| 32         | Melanoma  | 40          | 100 | Parietal  | Definitive        | No                 | 1             | Anti-PD1            | Crohn reactivation  | 4.3      | 726               | 45.5         | 45.5        |
| 29         | NSCLC     | 55          | 90  | Occipital | Definitive        | 3 x 9 Gy contralat | 2             | No                  | -                   | 14.2     | 675               | 56.2         | 56.2        |
| 7          | Breast    | 34          | 90  | Parietal  | Adjuvant          | No                 | 3             | No                  | -                   | 51.3     | 546               | 18           | 39.9        |
| 2          | Melanoma  | 34          | 100 | Frontal   | Adjuvant          | No                 | 1             | Anti-CTLA4/<br>PD-1 | Pancreatitis        | 15.7     | 387               | 48.2         | 48.2        |
| 15         | SCLC      | 53          | 80  | Parietal  | Adjuvant          | No                 | 1             | No                  | -                   | 25.4     | 290               | 9.6          | 9.6         |
| 23         | RCC       | 72          | 60  | Parietal  | Adjuvant          | No                 | 1             | Anti-PD-1           | No                  | 38.8     | 289               | 26.1         | 26.1        |
| 8          | Melanoma  | 79          | 90  | Temporal  | Adjuvant          | No                 | 1             | Anti-CTLA4/<br>PD-1 | Hypophysitis        | 29.6     | 53                | 6.5          | 6.5         |
