# Supplementary figures and images for: Five-Fraction Stereotactic Radiotherapy for Brain Metastases—A Retrospective Analysis
Source: MDPI journal article supplement (doi:10.3390/curroncol30020101), 2023-01-17

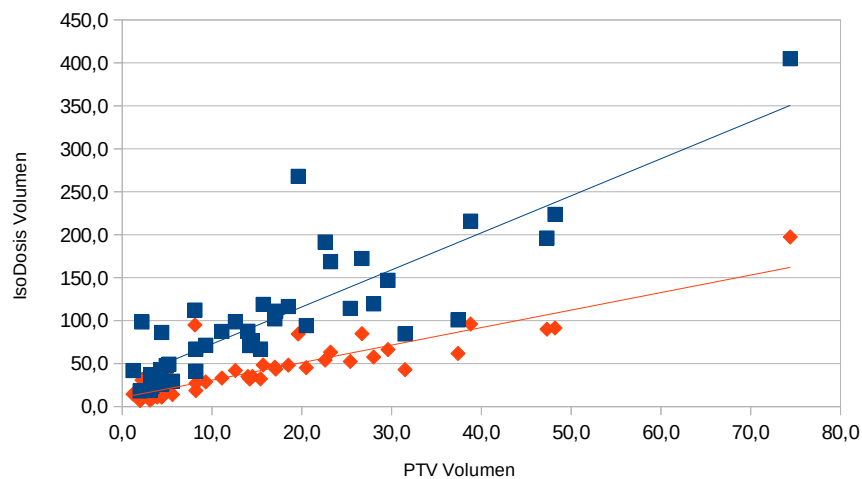

**A**

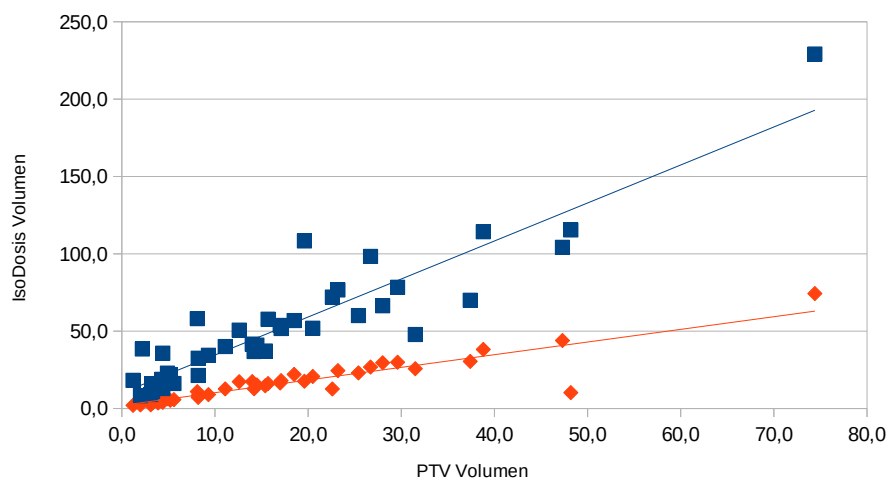

**B**

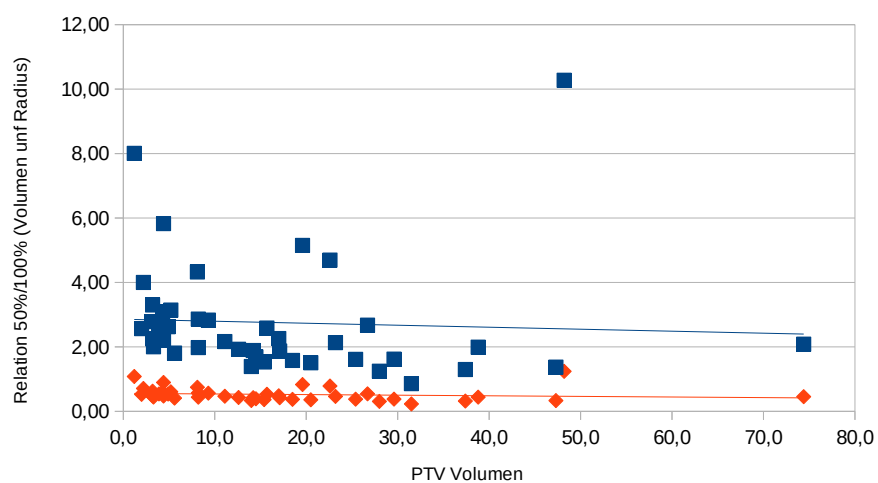

**C**

Supplement: s1 [file s1]
